# Supplementary material for: Biotinylated Polymer-Ruthenium Conjugates: In Vitro and In Vivo Studies in a Triple-Negative Breast Cancer Model
Source: MDPI journal article supplement (doi:10.3390/pharmaceutics14071388), 2022-06-30
Supplement: s1 [file s1]

## Supporting Information

### **Biotinylated Polymer-Ruthenium Conjugates: In Vitro and In Vivo Studies in a Triple-Negative Breast Cancer Model**

**Leonor Côrte-Real <sup>1</sup>, Ana Rita Brás <sup>1,2,3</sup>, Adhan Pilon <sup>1</sup>, Nuno Mendes <sup>4</sup>, Ana Sofia Ribeiro <sup>4</sup>, Tiago D. Martins <sup>5</sup>, José Paulo S. Farinha <sup>5</sup>, M. Conceição Oliveira <sup>5</sup>, Fátima Gärtner <sup>4</sup>, M. Helena Garcia <sup>1</sup>, Ana Preto <sup>2,3</sup> and Andreia Valente <sup>1,\*</sup>**

<sup>1</sup> Centro de Química Estrutural, Institute of Molecular Sciences and Departamento de Química e Bioquímica, Faculdade de Ciências, Universidade de Lisboa, Campo Grande, 1749-016 Lisboa, Portugal; ldcortereal@fc.ul.pt (L.C.-R.); pg31015@alunos.uminho.pt (A.R.B.); adpilon@fc.ul.pt (A.P.); mhgarcia@fc.ul.pt (M.H.G.)

<sup>2</sup> Centre of Molecular and Environmental Biology, Department of Biology, University of Minho, Campus de Gualtar, 4710-057 Braga, Portugal; apreto@bio.uminho.pt

<sup>3</sup> Institute of Science and Innovation for Bio-Sustainability, University of Minho, Campus de Gualtar, Edifício 18, 4710-057 Braga, Portugal

<sup>4</sup> i3S—Instituto de Investigação e Inovação em Saúde, Universidade do Porto, 4200-135 Porto, Portugal; nmendes@ipatimup.pt (N.M.); aribeiro@ipatimup.pt (A.S.R.); fgartner@ipatimup.pt (F.G.)

<sup>5</sup> Centro de Química Estrutural, Institute of Molecular Sciences and Department of Chemical Engineering, Instituto Superior Técnico, Universidade de Lisboa, Av. Rovisco Pais, 1049-001 Lisboa, Portugal; tiagodmartins@tecnico.ulisboa.pt (T.D.M.); farinha@tecnico.ulisboa.pt (J.P.S.F.); conceicao.oliveira@tecnico.ulisboa.pt (M.C.O.)

\* Correspondence: amvalente@fc.ul.pt

### FT-IR spectra

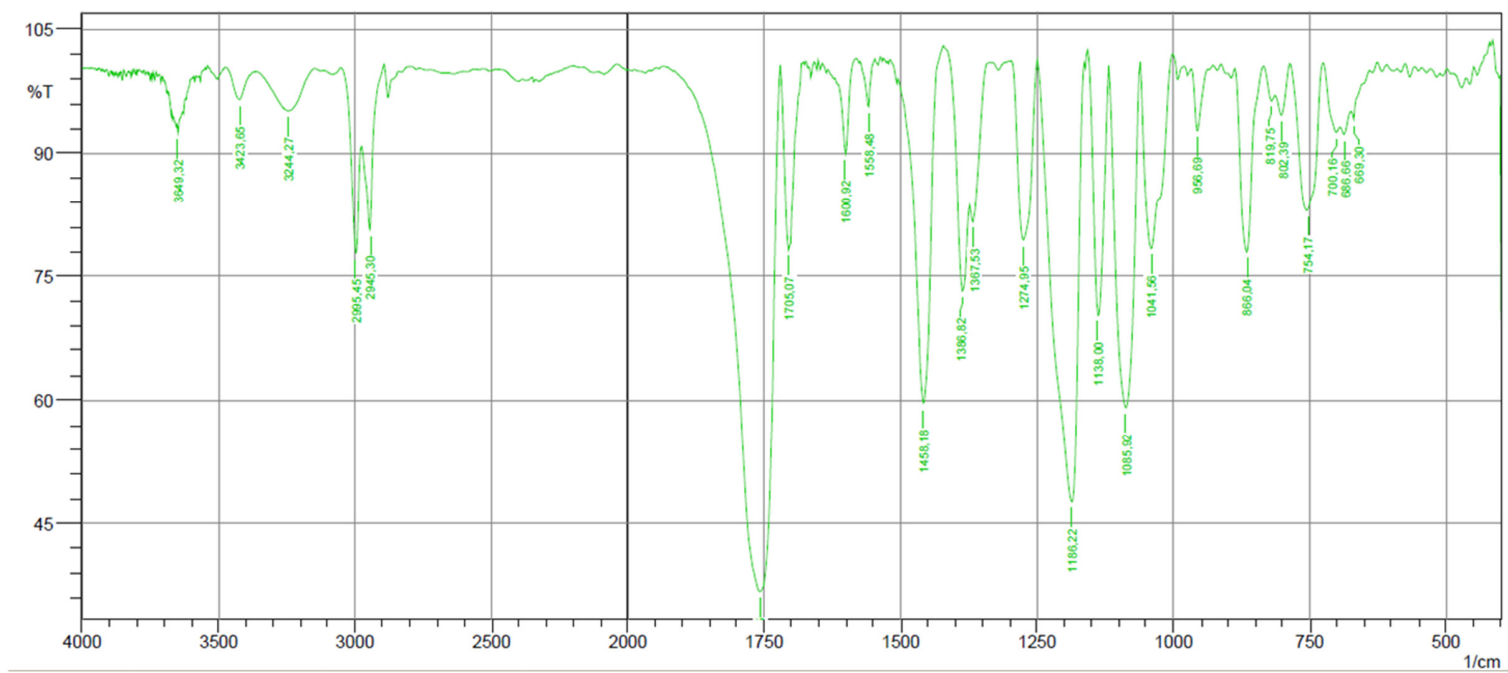

**Figure S1.** FT-IR spectrum of Ligand L1.

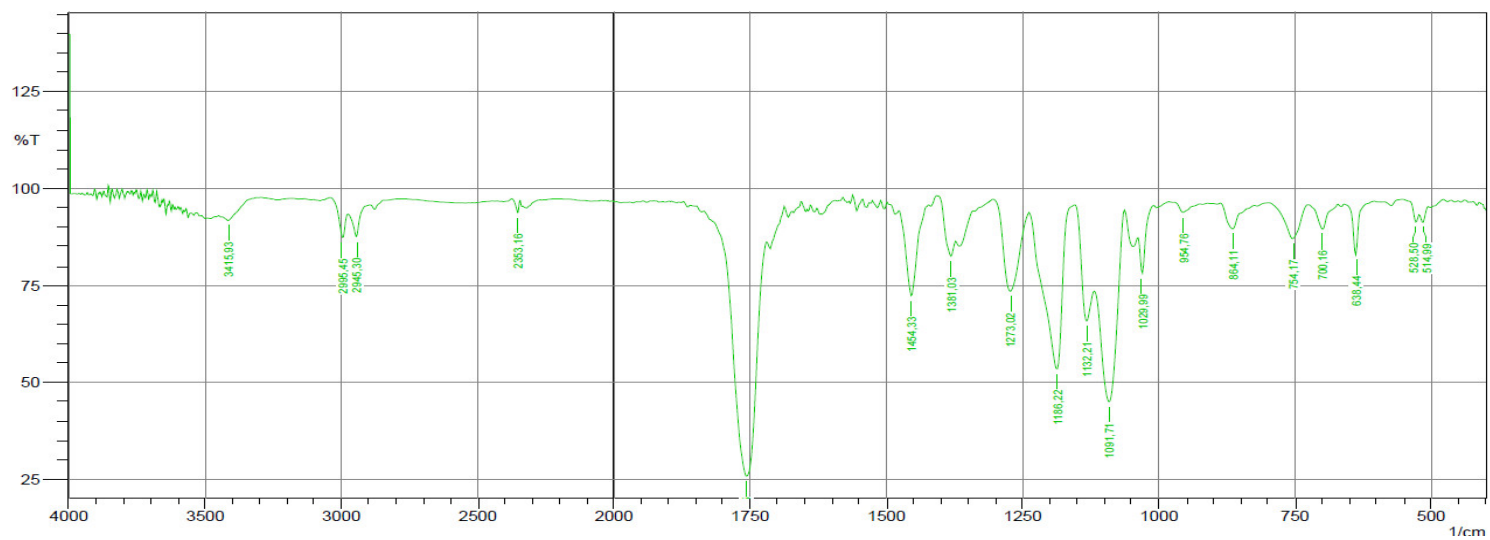

**Figure S2.** FT-IR spectrum of Complex 1.

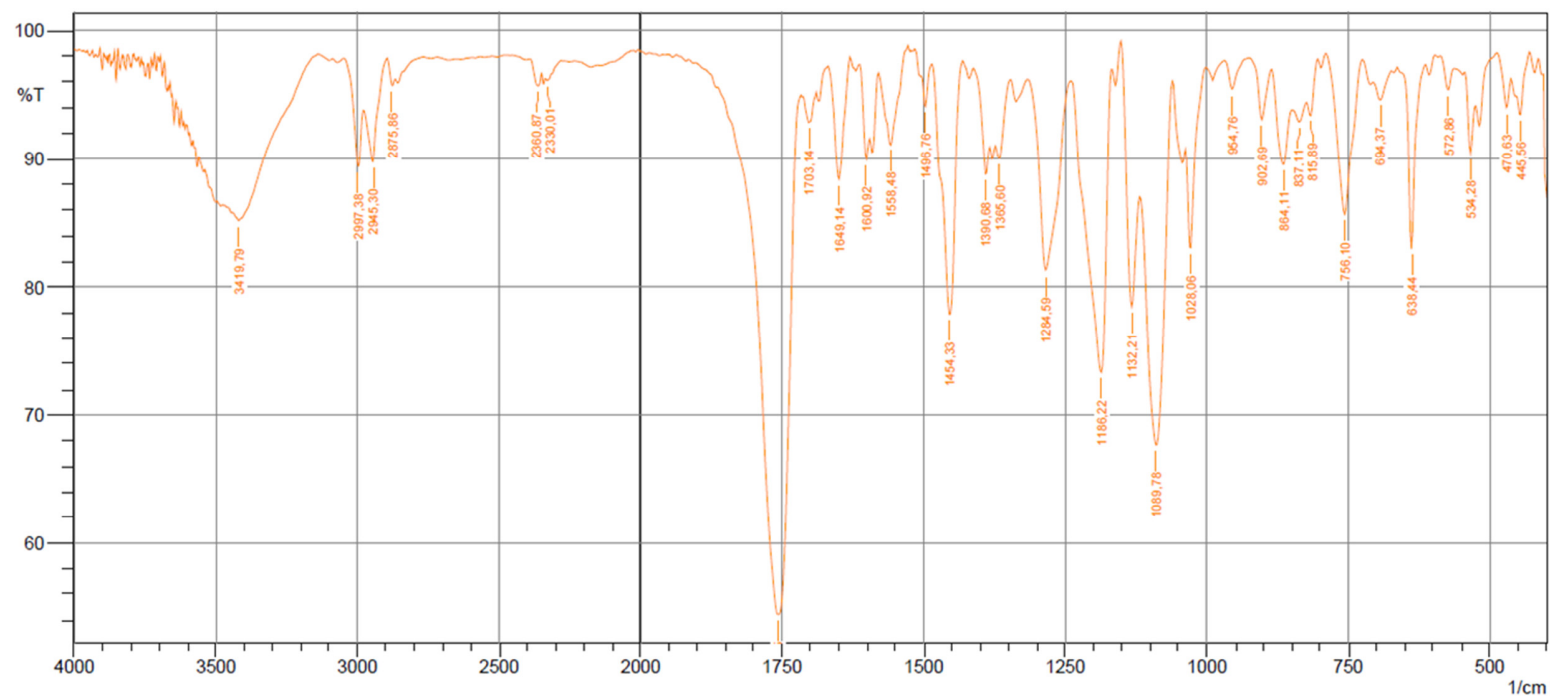

Figure S3. FT-IR spectrum of complex 2.

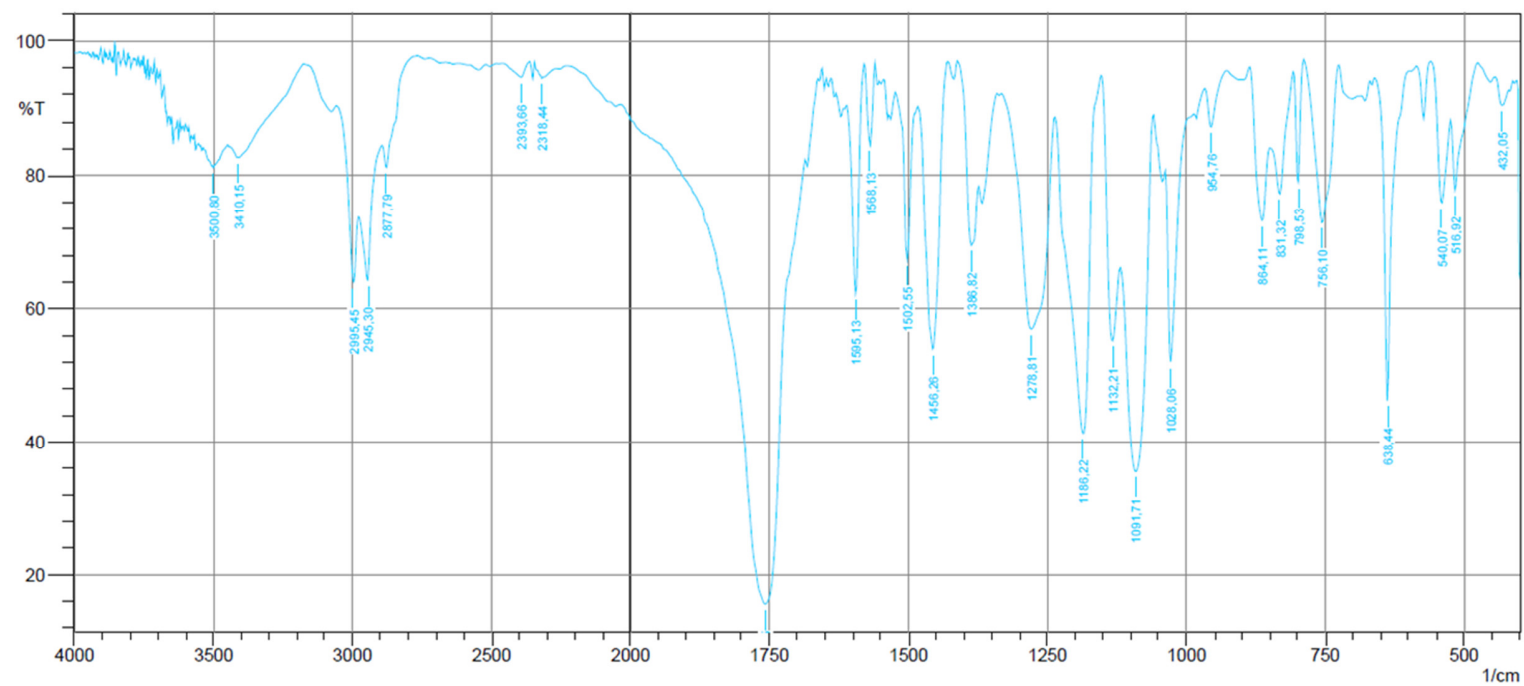

**Figure S4.** FT-IR spectrum of complex 3.

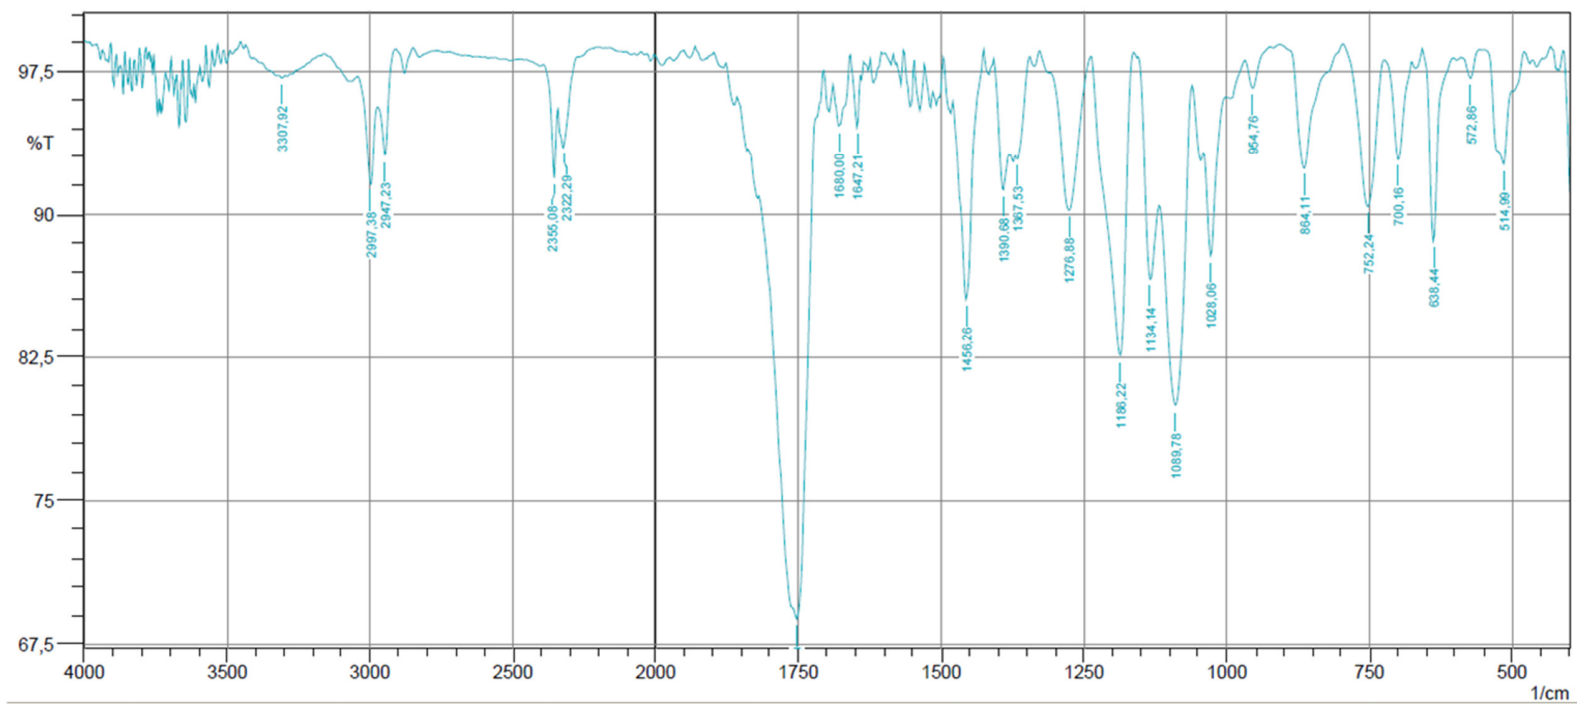

Figure S5. FT-IR spectrum of complex 4.

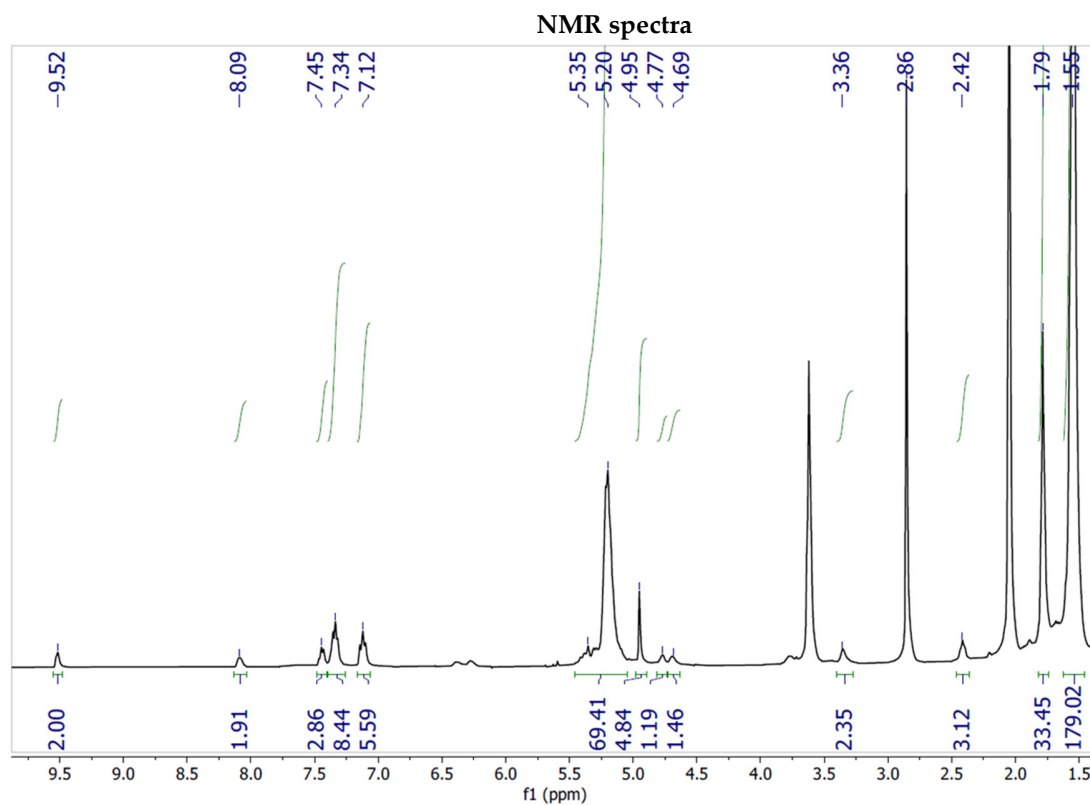

**Figure S6.**  $^1\text{H}$ -NMR spectrum of complex **1** in acetone- $d_6$  at 298 K.

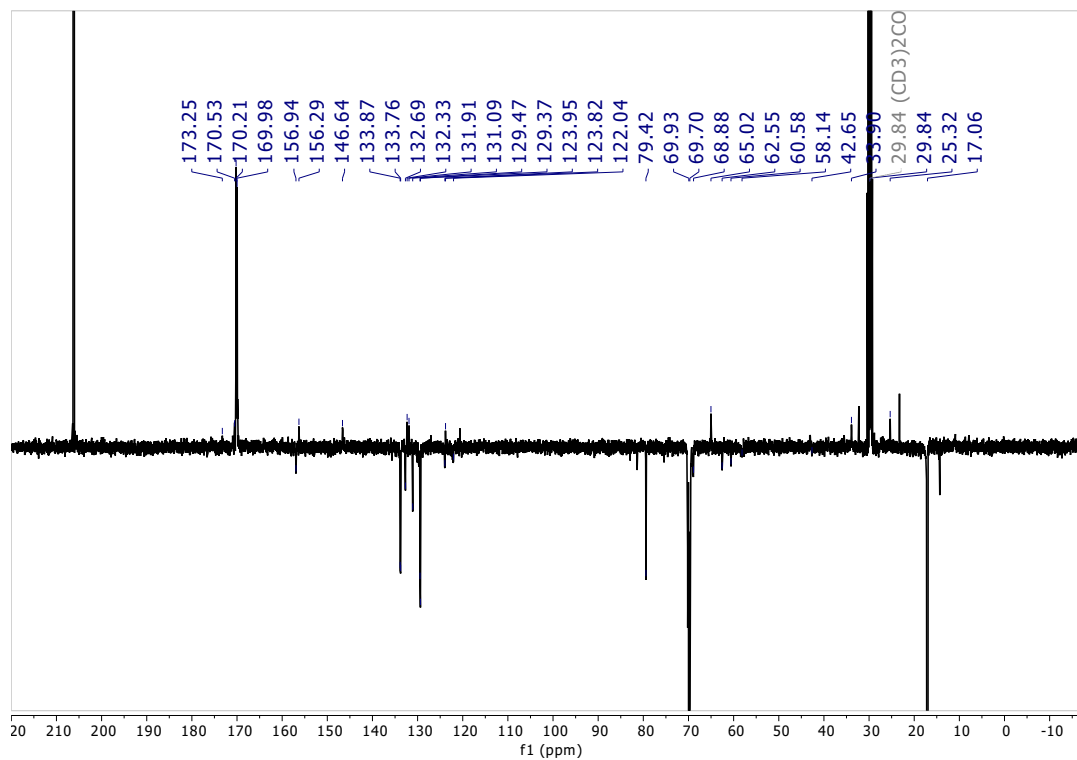

**Figure S7.** APT  $^{13}\text{C}\{^1\text{H}\}$ -NMR spectrum of complex **1** in acetone- $d_6$  at 298 K.

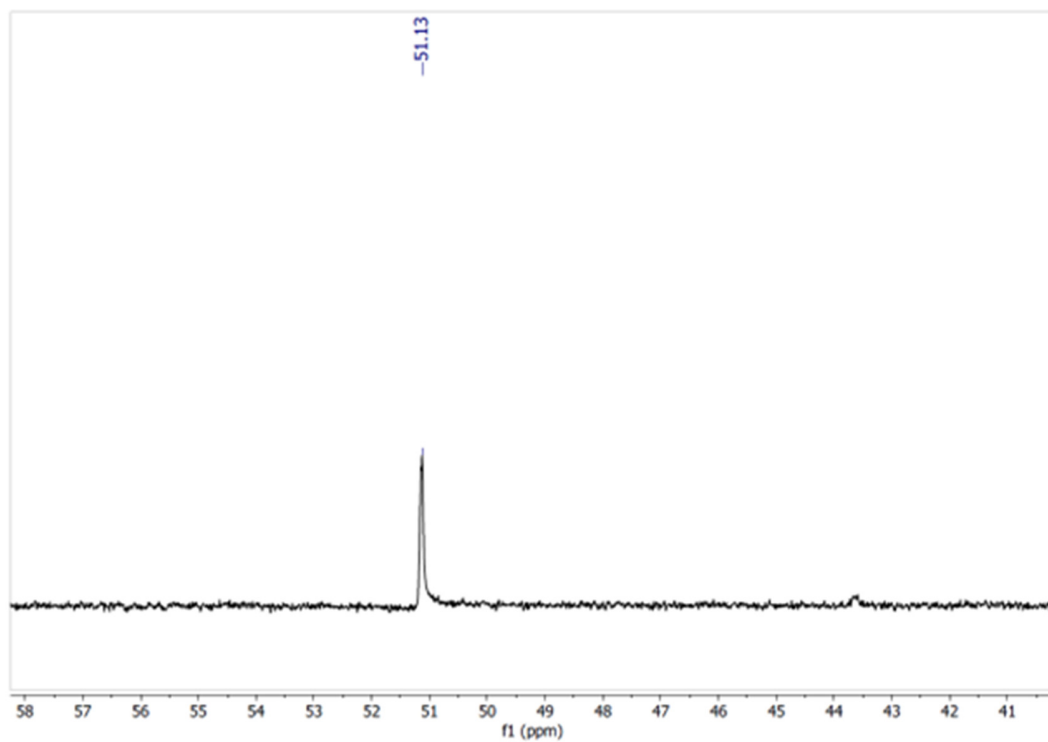

**Figure S8.**  $^{31}\text{P}\{^1\text{H}\}$ -NMR spectrum of complex **1** in acetone- $d_6$  at 298 K.

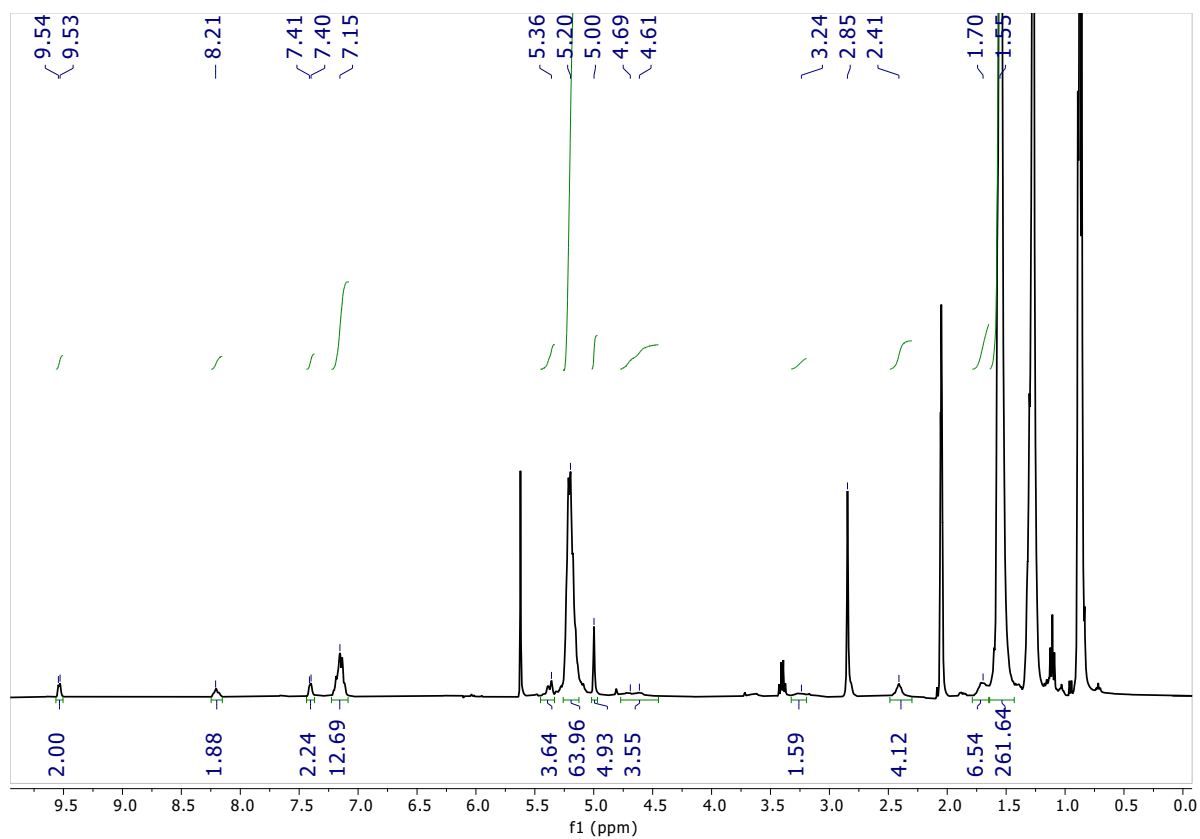

**Figure S9.**  $^1\text{H}$ -NMR spectrum of complex **2** in acetone- $d_6$  at 298 K.



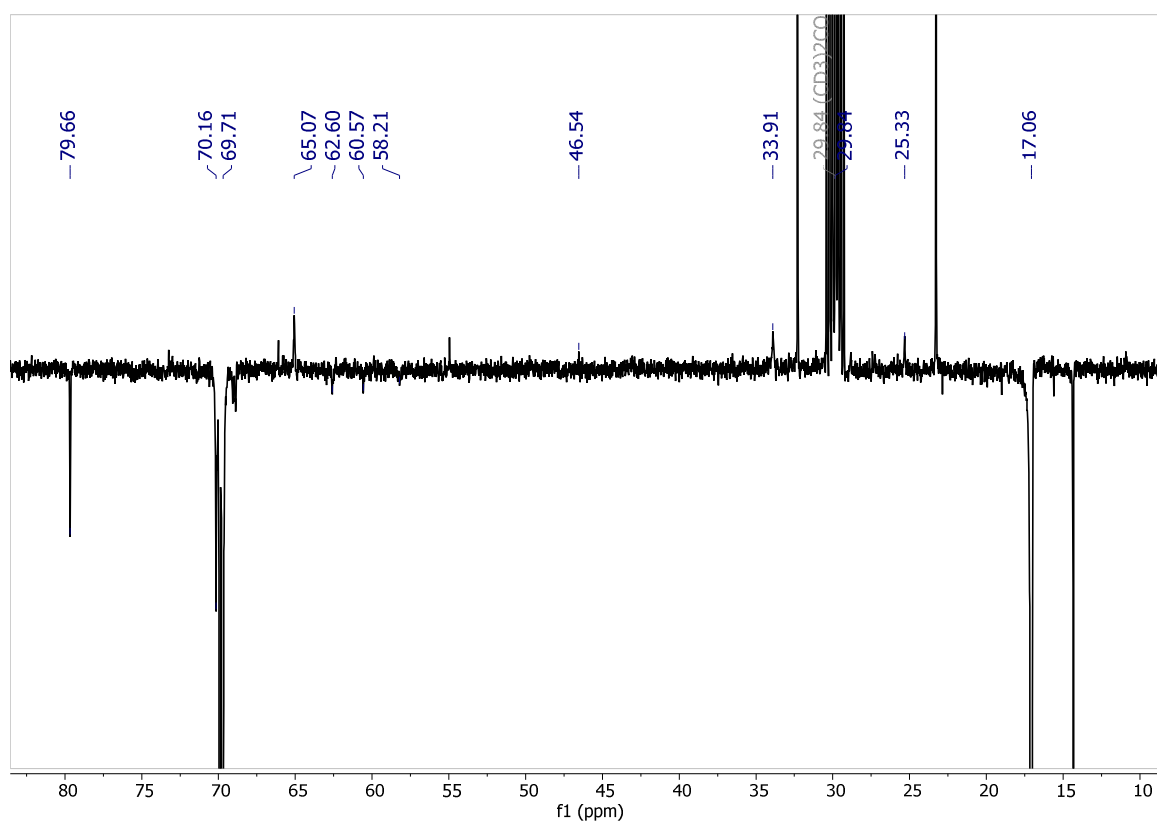

**Figure S10.** APT  $^{13}\text{C}\{^1\text{H}\}$ -NMR spectrum of complex **2** in acetone- $d_6$  at 298 K.

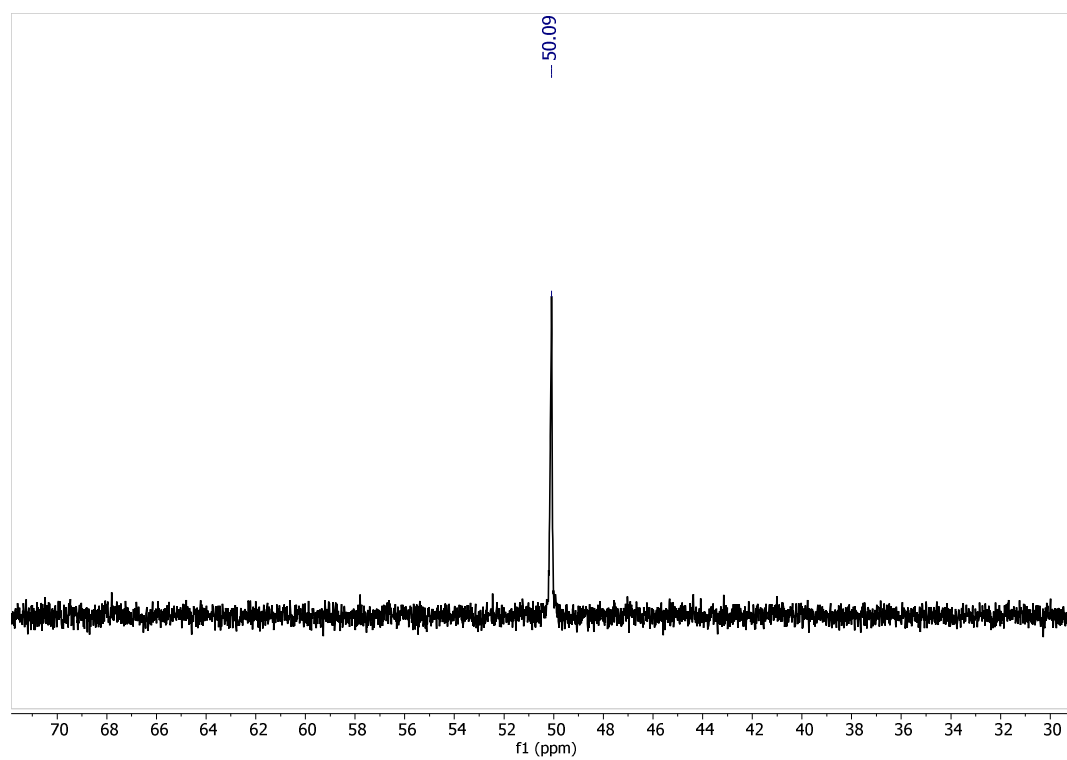

**Figure S11.**  $^{31}\text{P}\{^1\text{H}\}$ -NMR spectrum of complex **2** in acetone- $d_6$  at 298 K.

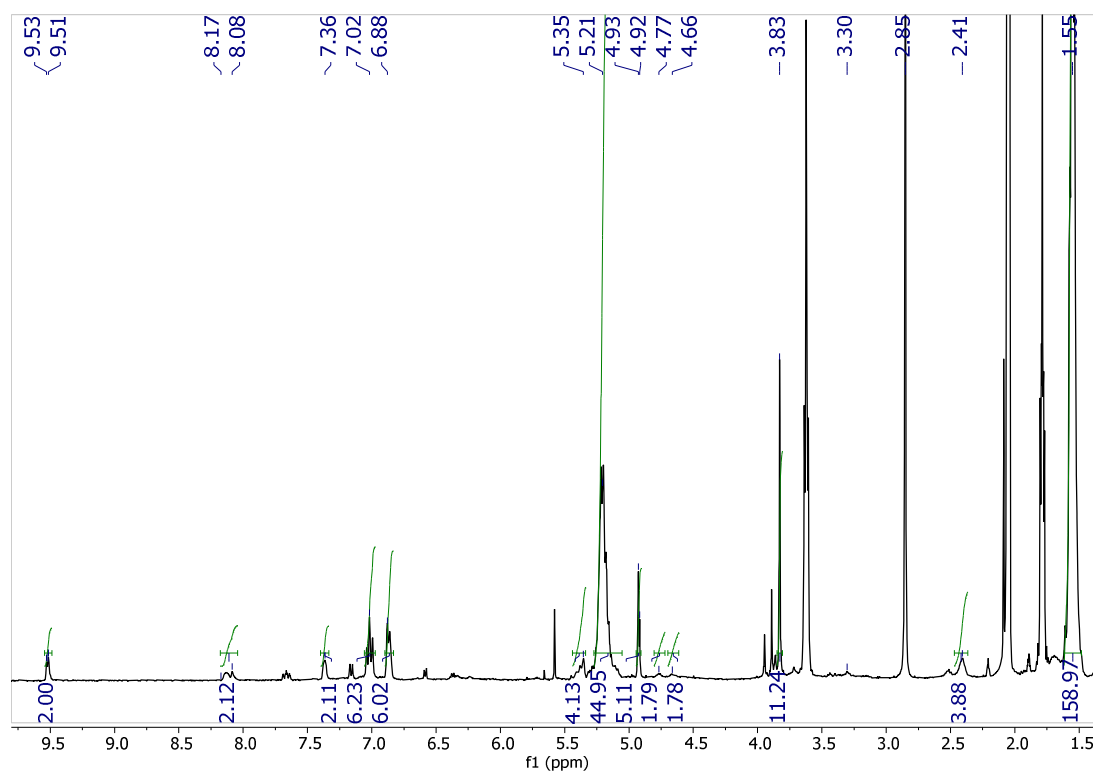

Figure S12. <sup>1</sup>H-NMR spectrum of complex 3 in acetone-d<sub>6</sub> at 298 K.

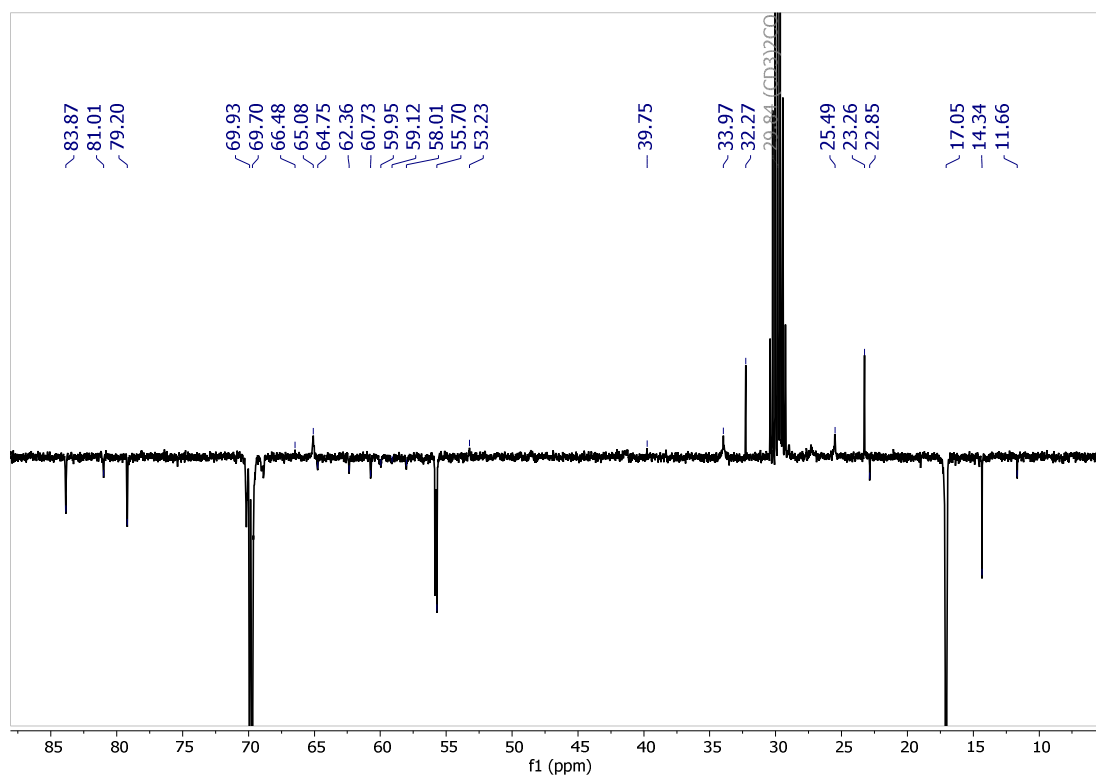

Figure S13. APT <sup>13</sup>C{<sup>1</sup>H}-NMR spectrum of complex 3 in acetone-d<sub>6</sub> at 298 K.

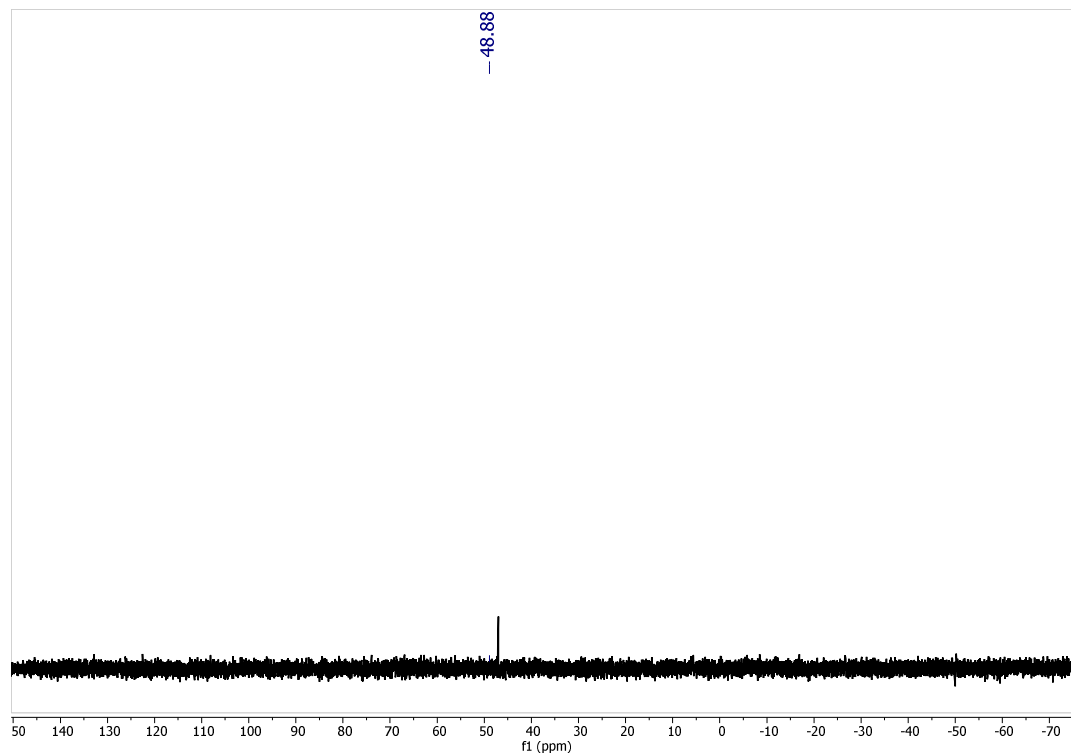

**Figure S14.**  $^{31}\text{P}\{^1\text{H}\}$ -NMR spectrum of complex 3 in acetone- $d_6$  at 298 K.

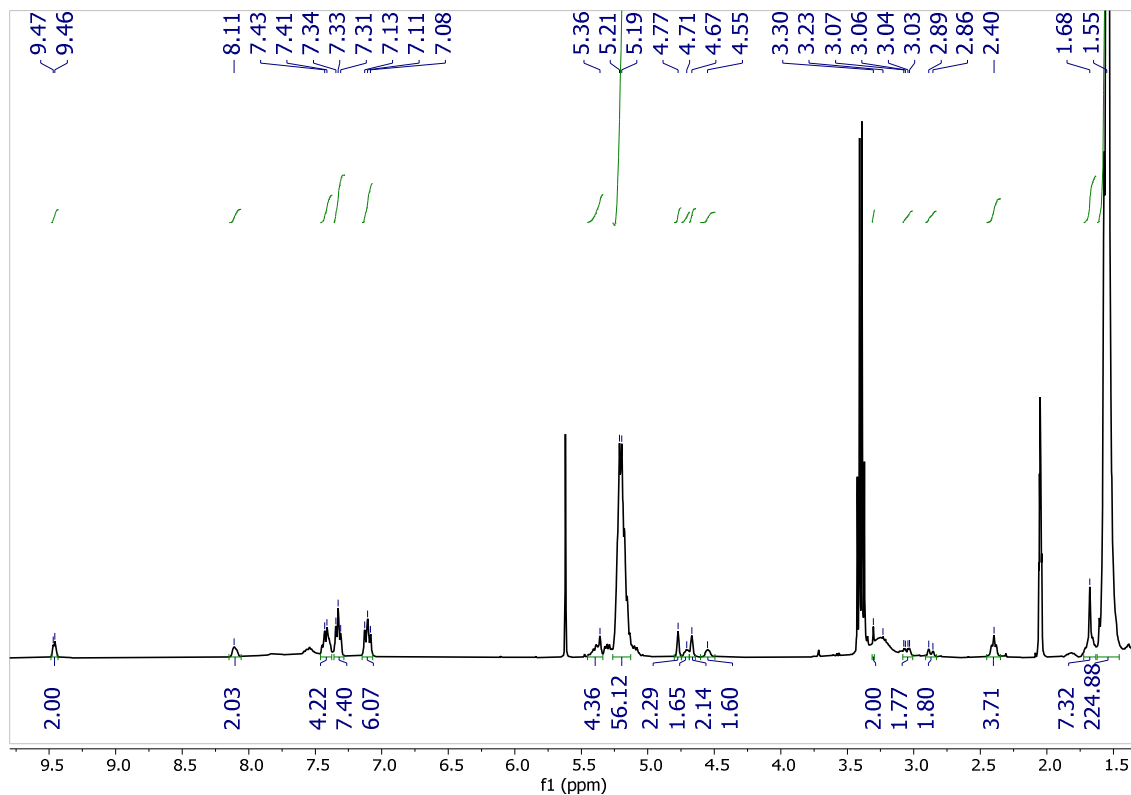

**Figure S15.**  $^1\text{H}$ -NMR spectrum of complex 4 in acetone- $d_6$  at 298 K.

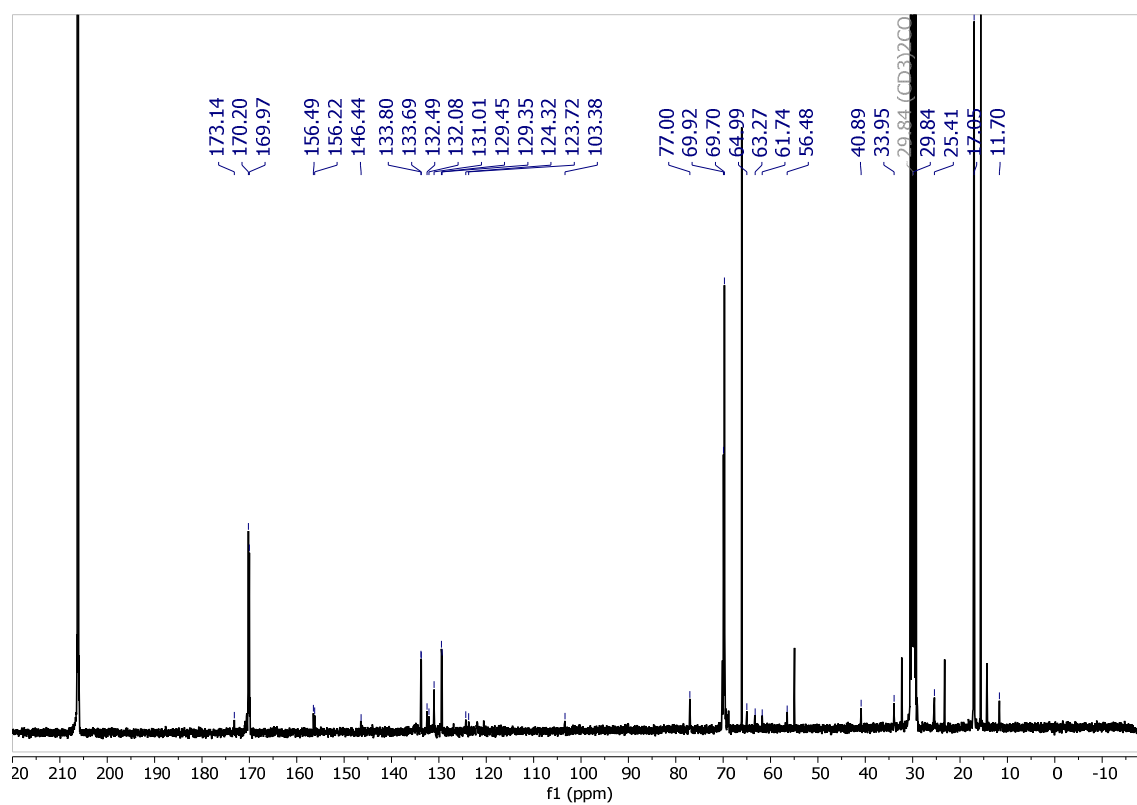

**Figure S16.**  $^{13}\text{C}\{^1\text{H}\}$ -NMR spectrum of complex **4** in acetone- $d_6$  at 298 K.

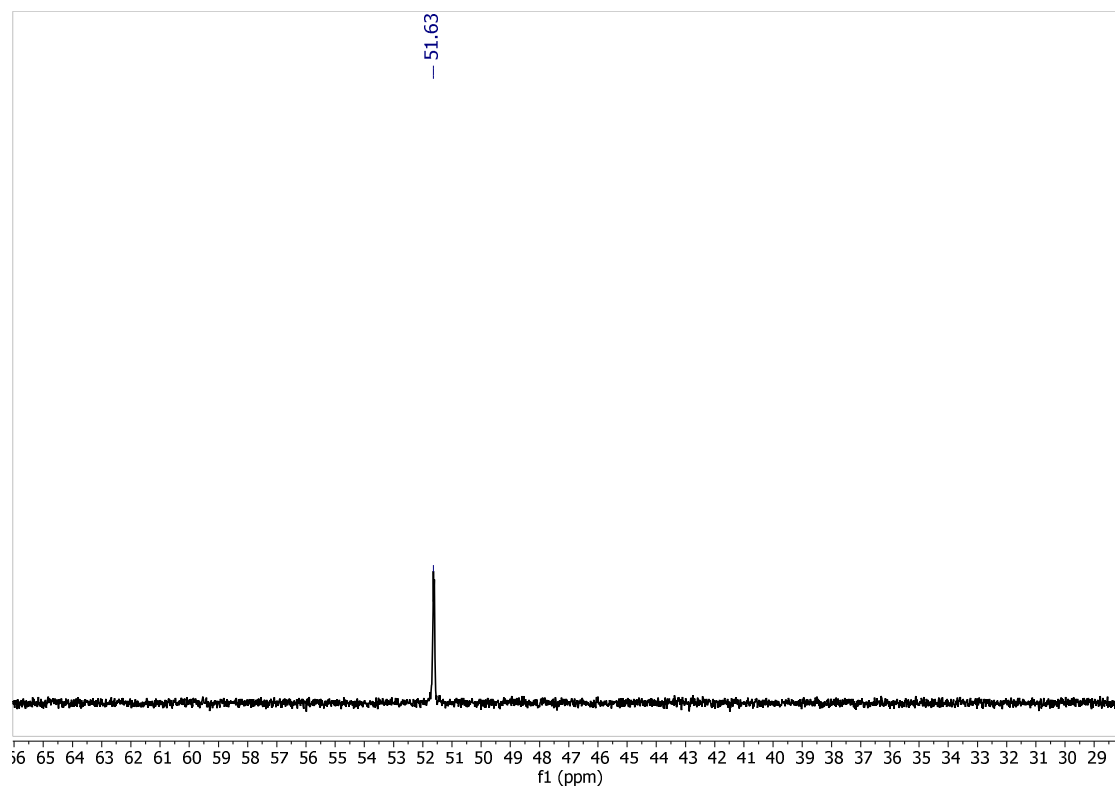

**Figure S17.**  $^{31}\text{P}\{^1\text{H}\}$ -NMR spectrum of complex **4** in acetone- $d_6$  at 298 K.

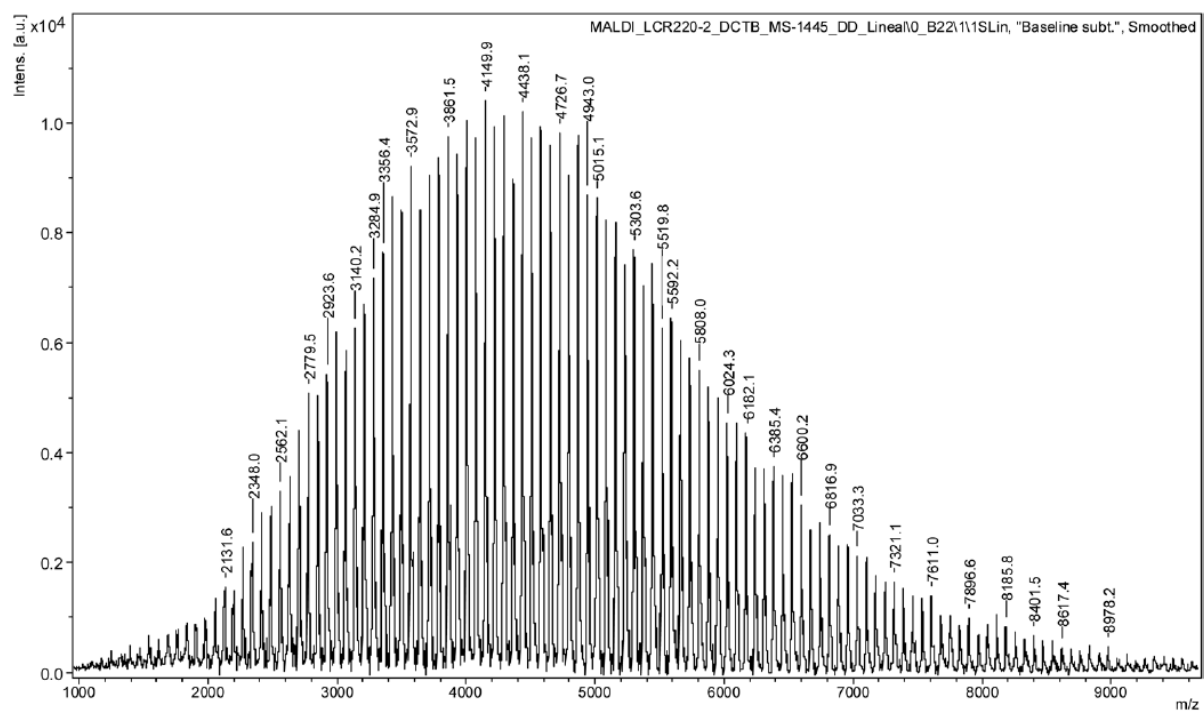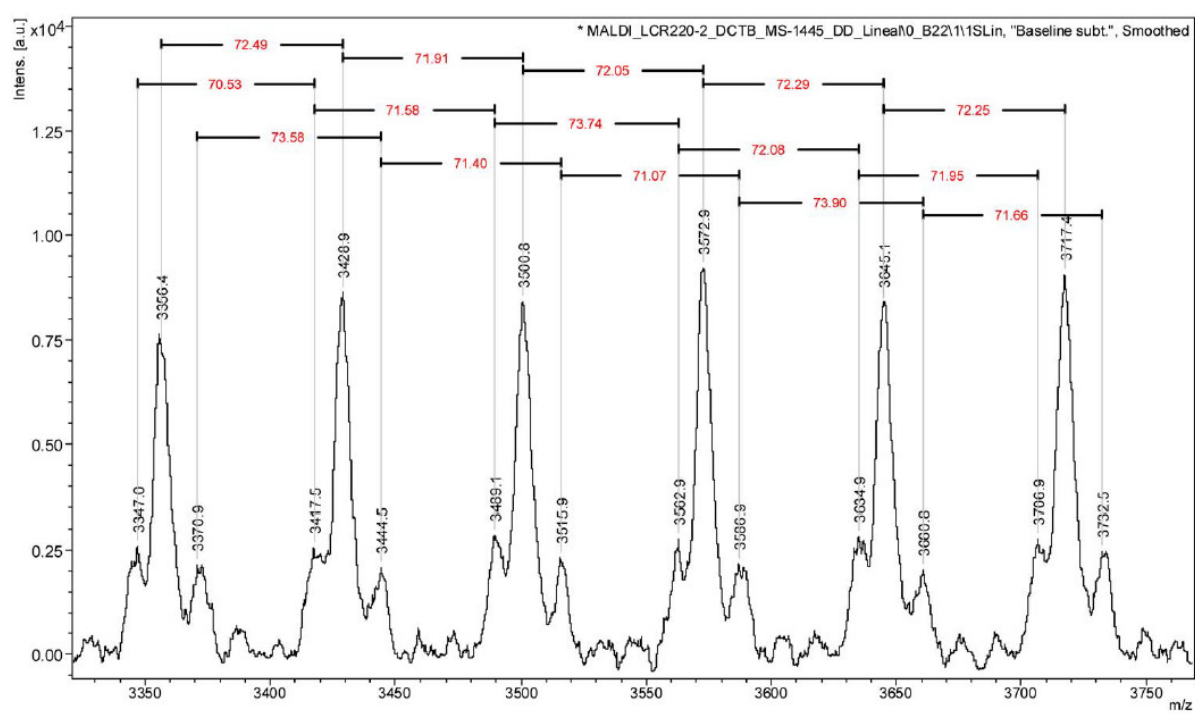

Figure S18. MALDI-TOF MS analysis of Compound 1.

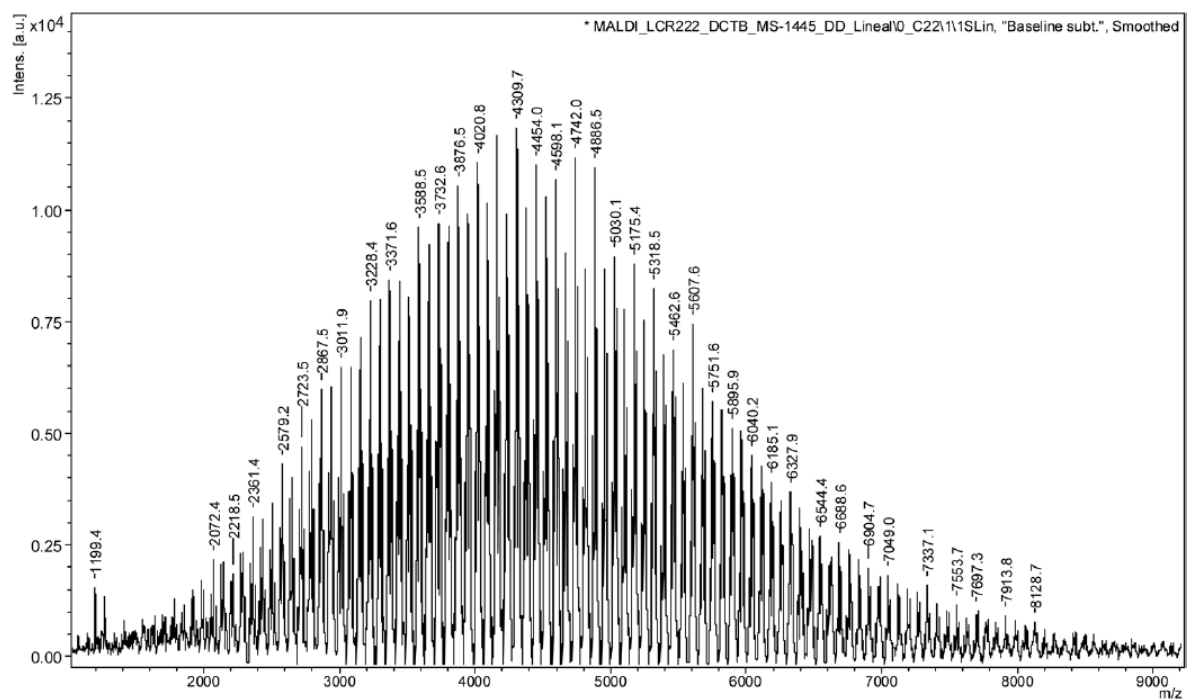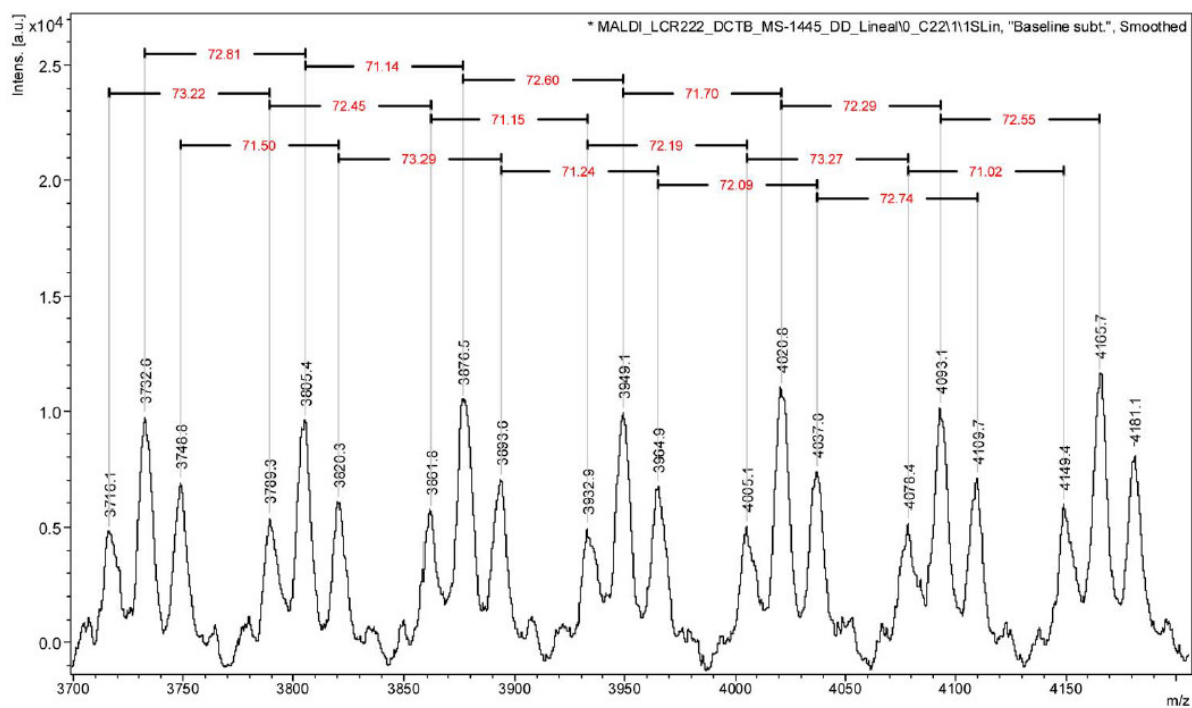

**Figure S19.** MALDI-TOF MS analysis of Compound 2.

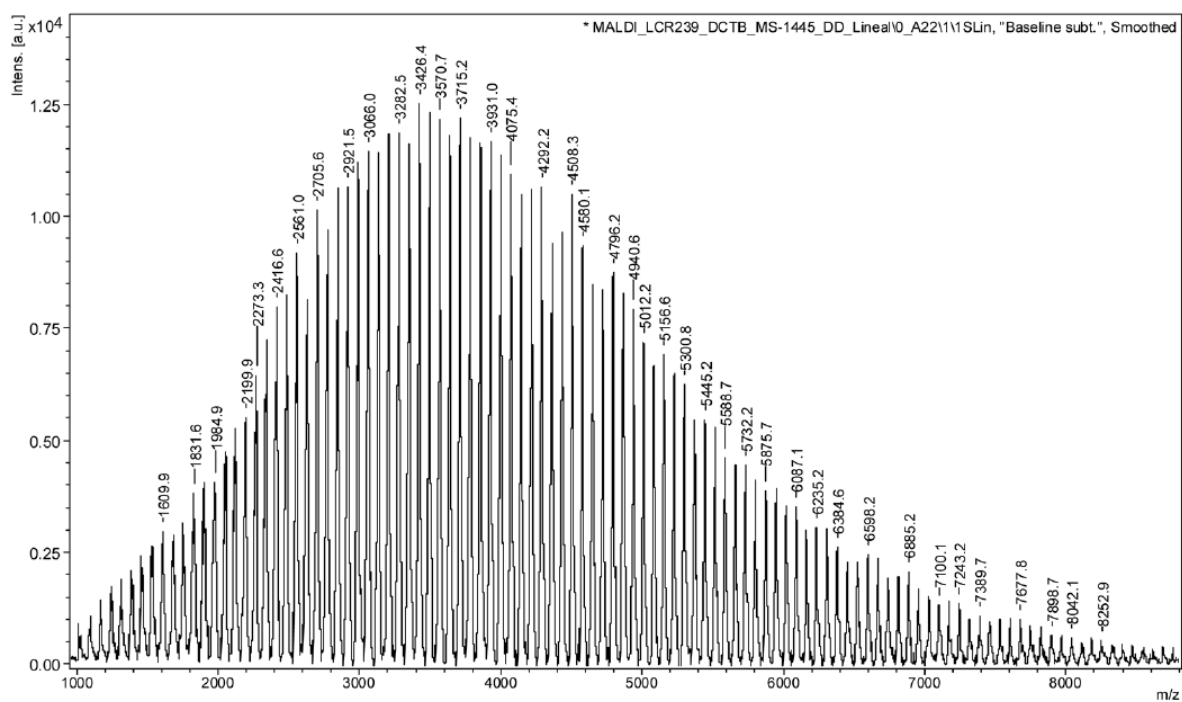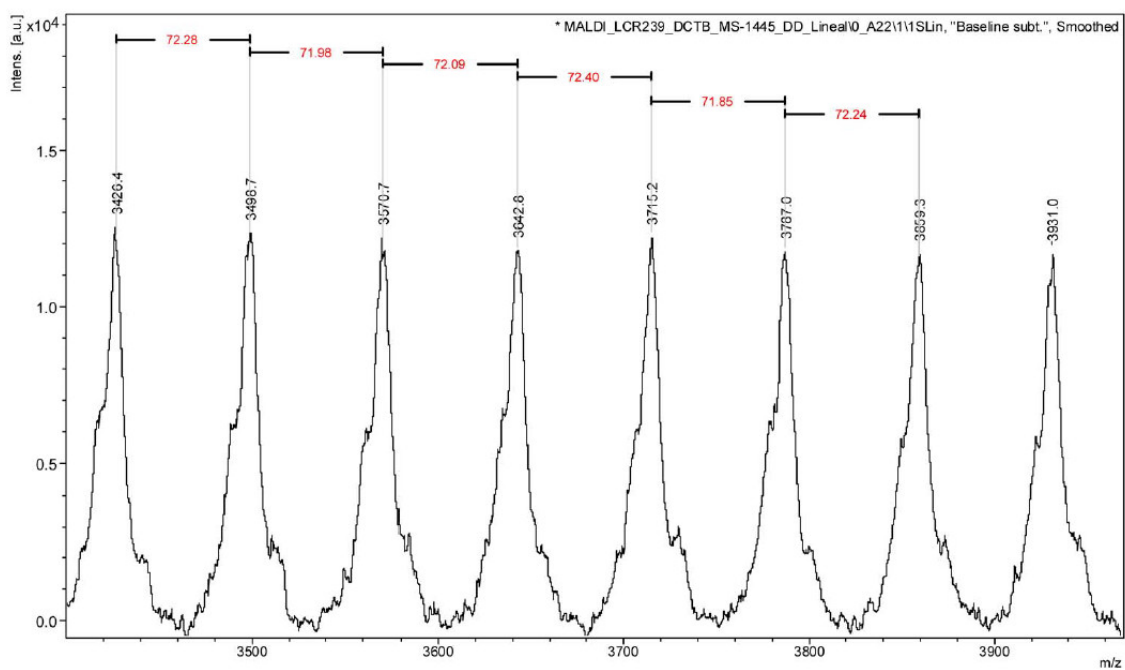

Figure S20. MALDI-TOF MS analysis of Compound 3.

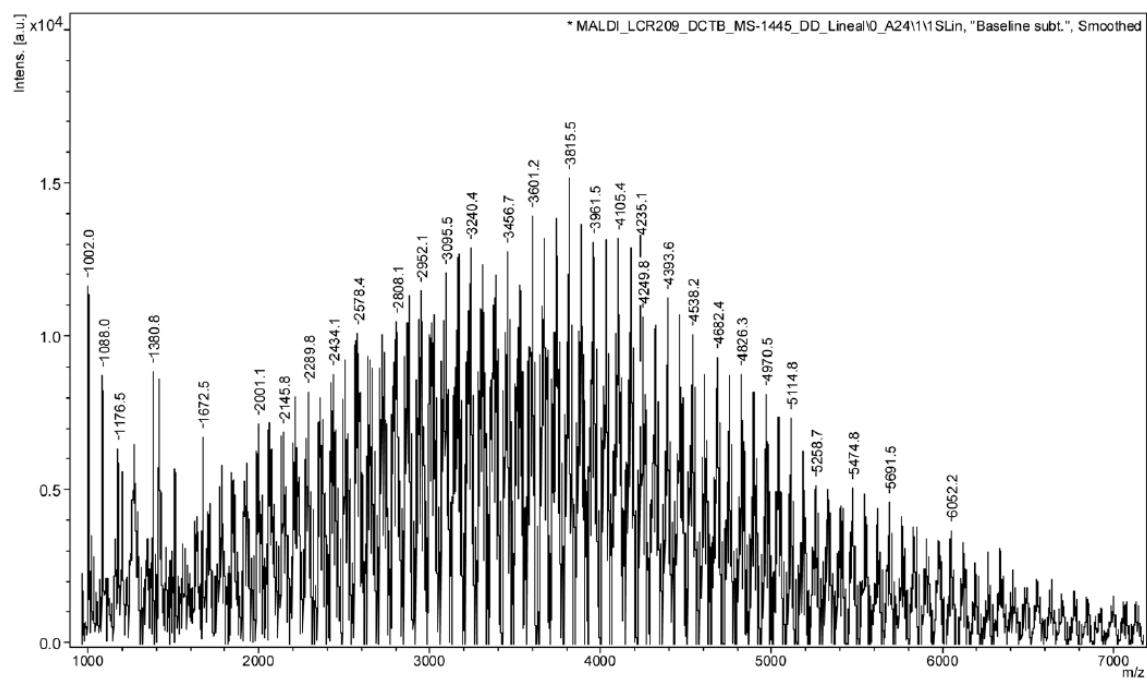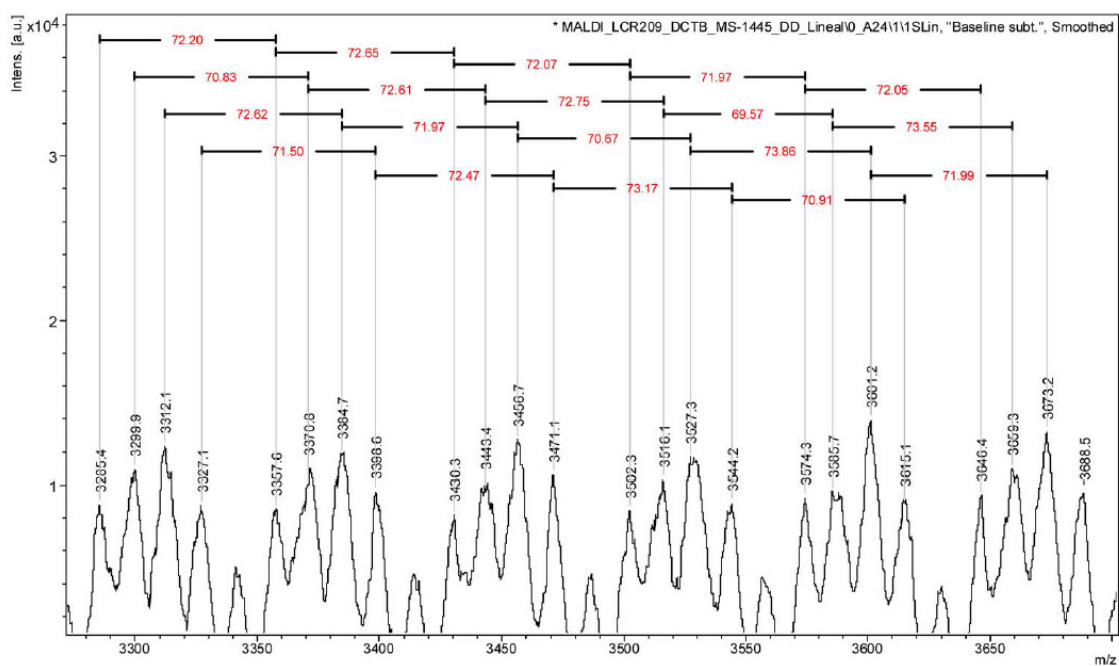

Figure S21. MALDI-TOF MS analysis of Compound 4.



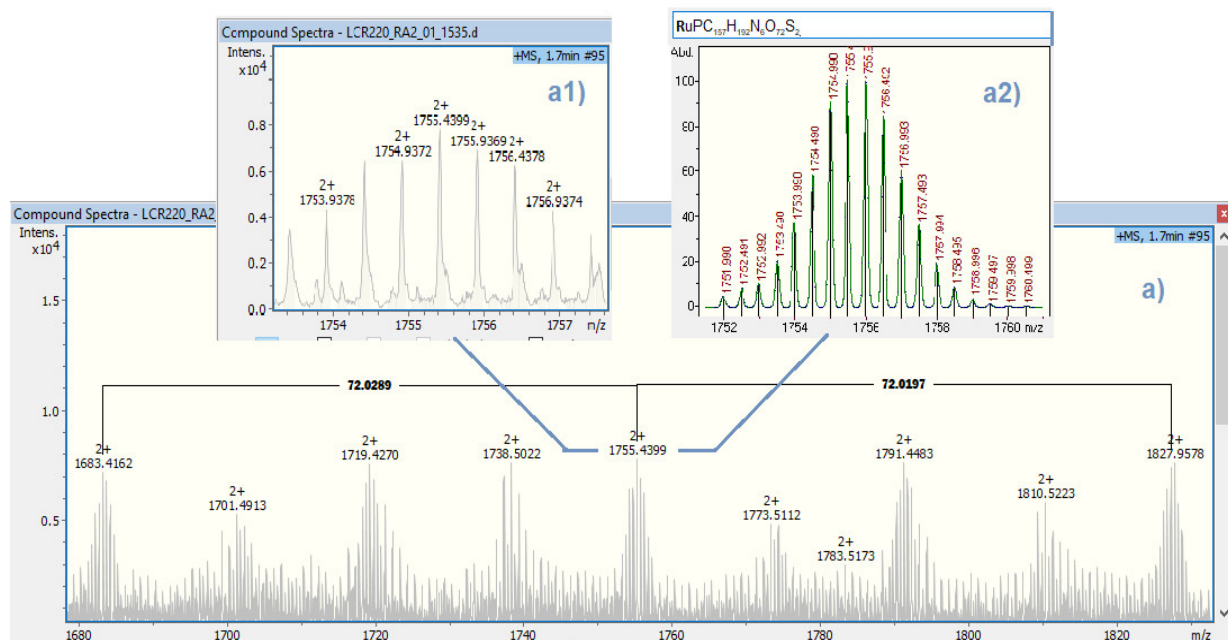

**Figure S22.** Partial HR mass spectrum obtained in the ESI positive mode of a methanolic solution of complex **1**. **a)** series of double charge ions attributed to  $[\text{Ru}(\eta^5\text{-Cp})(\text{P}(\text{C}_6\text{H}_5)_3)(2,2'\text{-bipy-4,4'-(PLA)}_{n=16;17;18}\text{-biotin}))]^{2+}$  structures spaced by 72.02 u; **a1)** the group of peaks at  $m/z$  1755.44 assigned to  $[\text{Ru}(\eta^5\text{-Cp})(\text{P}(\text{C}_6\text{H}_5)_3)(2,2'\text{-bipy-4,4'-(PLA)}_{n=16;17;18}\text{-biotin}))]^{2+}$  exhibited a measured isotopic pattern as the calculated for the sum  $[\text{RuPC}_{157}\text{H}_{192}\text{N}_6\text{O}_{72}\text{S}_2]^{2+}$  shown in **a2)**.

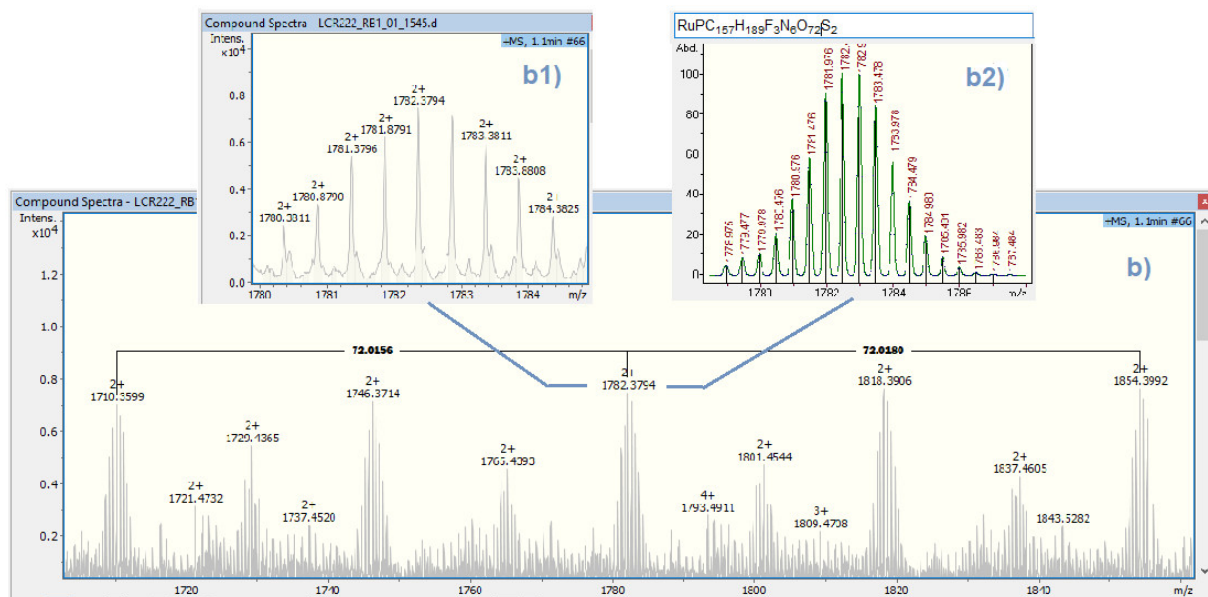

**Figure S23.** Partial HR mass spectrum obtained in the ESI positive mode of a methanolic solution of complex **2**. **b)** series of double charge ions attributed to  $[\text{Ru}(\eta^5\text{-Cp})(\text{P}(\text{C}_6\text{H}_4\text{F})_3)(2,2'\text{-bipy-4,4'-(PLA)}_{n=16;17;18}\text{-biotin})]^{2+}$  structures spaced by 72.02 u; **b1)** the group of peaks at  $m/z$  1782.47 assigned to  $[\text{Ru}(\eta^5\text{-Cp})(\text{P}(\text{C}_6\text{H}_4\text{F})_3)(2,2'\text{-bipy-4,4'-(PLA)}_{n=16;17;18}\text{-biotin})]^{2+}$  exhibited a measured isotopic pattern as the calculated for the sum  $[\text{RuPC}_{157}\text{H}_{189}\text{F}_3\text{N}_6\text{O}_{72}\text{S}_2]^{2+}$  shown in **b2)**.

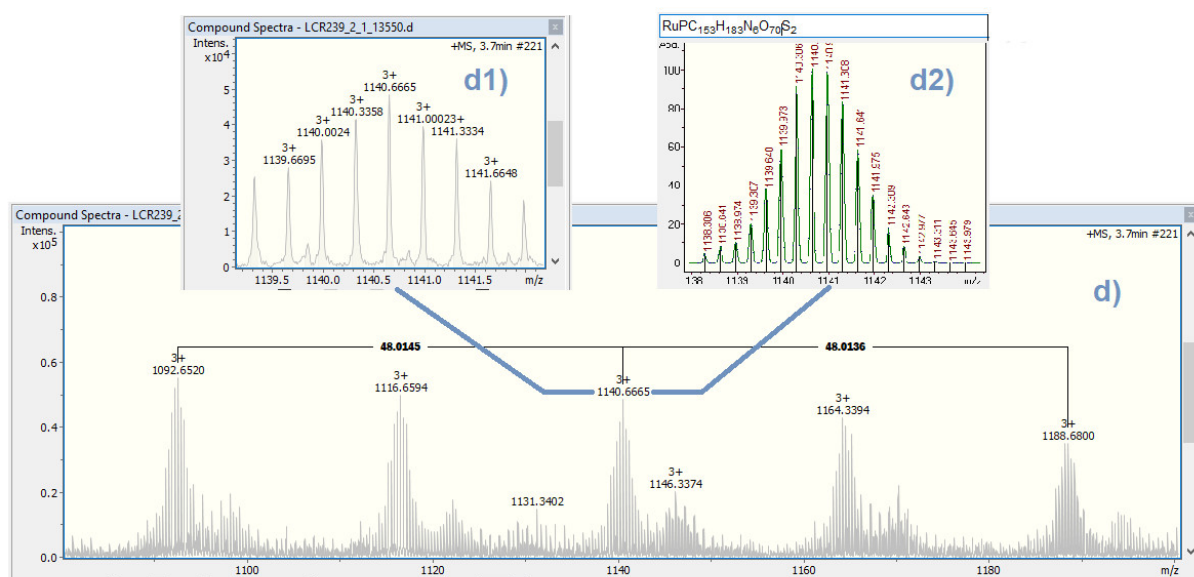

**Figure S24.** Partial HR mass spectrum obtained in the ESI positive mode of a methanolic solution of complex **3**. **d)** series of triple charge ions attributed to  $[Ru(\eta^5-Cp)(P(C_6H_4OCH_3)_3(2,2'-bipy-4,4'-(PLA)_{n=15;16;17}-biotin))]^{3+}$  structures spaced by 48.01 u; **d1)** the group of peaks at  $m/z$  1188.35 assigned to  $[Ru(\eta^5-Cp)[P(C_6H_4)_3(CHO)_2](2,2'-bipy-4,4'-(PLA)_{n=16}-biotin))]^{3+}$  exhibited a measured isotopic pattern as the calculated for the sum  $[RuPC_{153}H_{183}N_6O_{70}S_2]^{3+}$  shown in **d2)**.

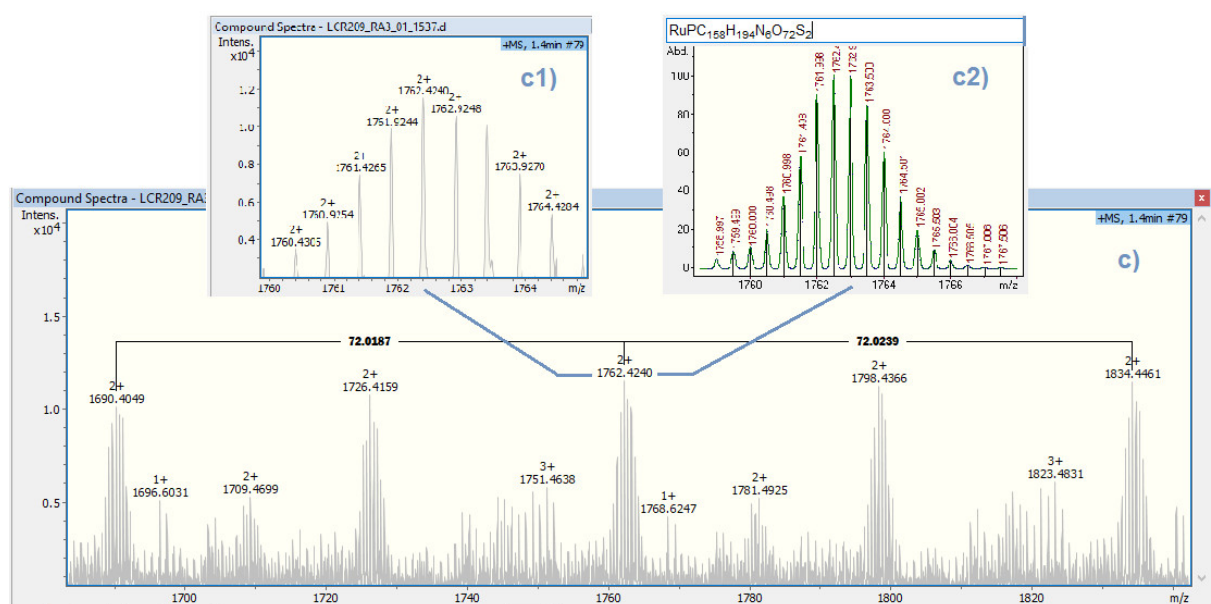

**Figure S25.** Partial HR mass spectrum obtained in the ESI positive mode of a methanolic solution of complex **4**. **c)** series of double charge ions attributed to  $[\text{Ru}(\eta^5\text{-CpCH}_3)(\text{P}(\text{C}_6\text{H}_5)_3)(2,2'\text{-bipy-4,4'-(PLA)}_{n=16;17;18}\text{-biotin)})]^{2+}$  structures spaced by 72.02 u; **c1)** the group of peaks at  $m/z$  1762.42 assigned to  $[\text{Ru}(\eta^5\text{-CpCH}_3)(\text{P}(\text{C}_6\text{H}_5)_3)(2,2'\text{-bipy-4,4'-(PLA)}_{n=16;17;18}\text{-biotin)})]^{2+}$  exhibited a measured isotopic pattern as the calculated for the sum  $[\text{RuPC}_{158}\text{H}_{194}\text{N}_6\text{O}_{72}\text{S}_2]^{2+}$  shown in **c2)**.

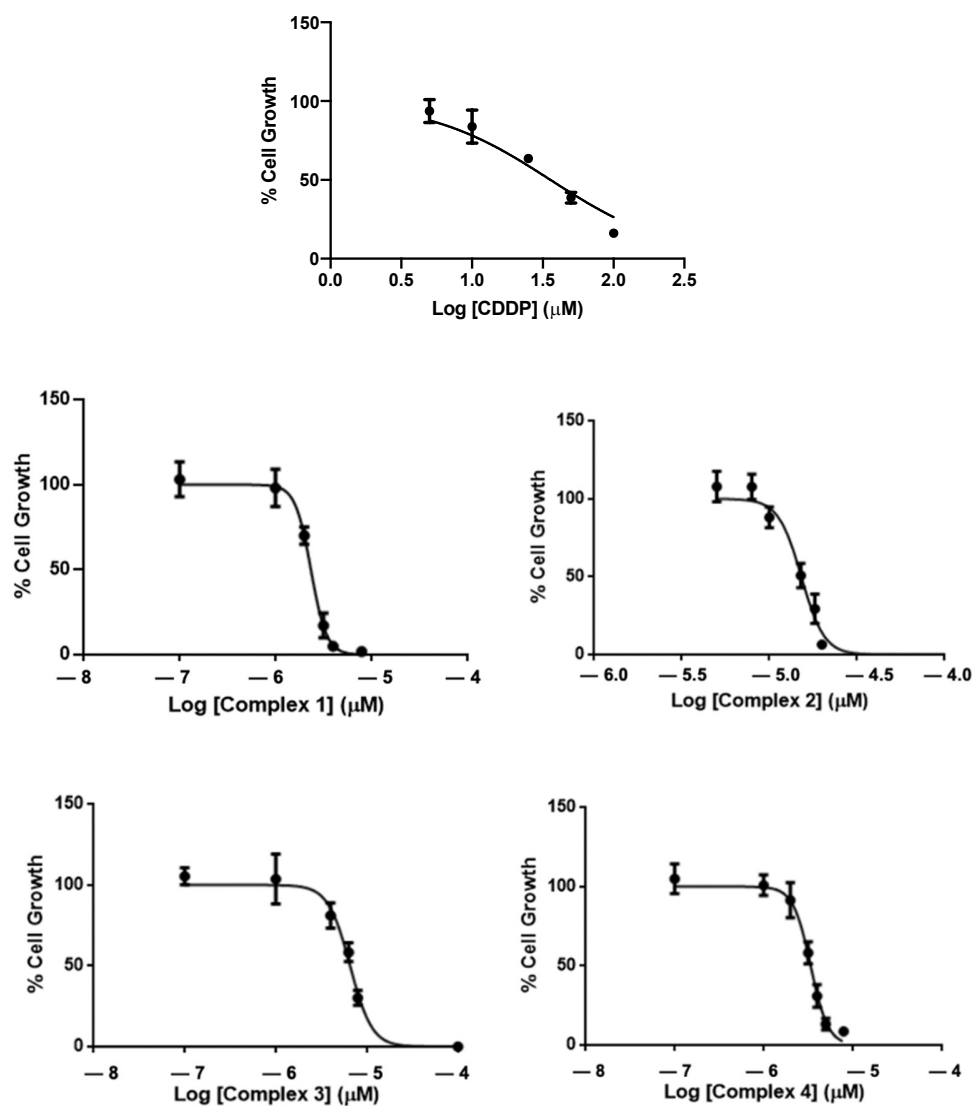

**Figure S26.** Dose-response curve of cell viability in MDA-MB-231 cell line for determination of  $\text{IC}_{50}$  by MTT (complexes 1-4) or Sulforhodamine B (Cisplatin) after 48 h incubation.

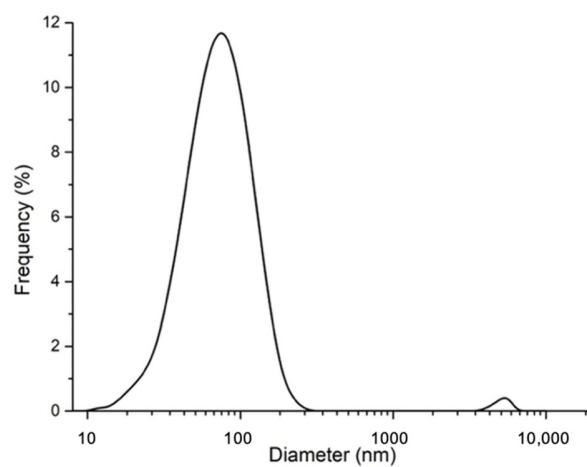

**Figure S27.** Hydrodynamic diameter distribution (obtained by DLS) of complex 1.

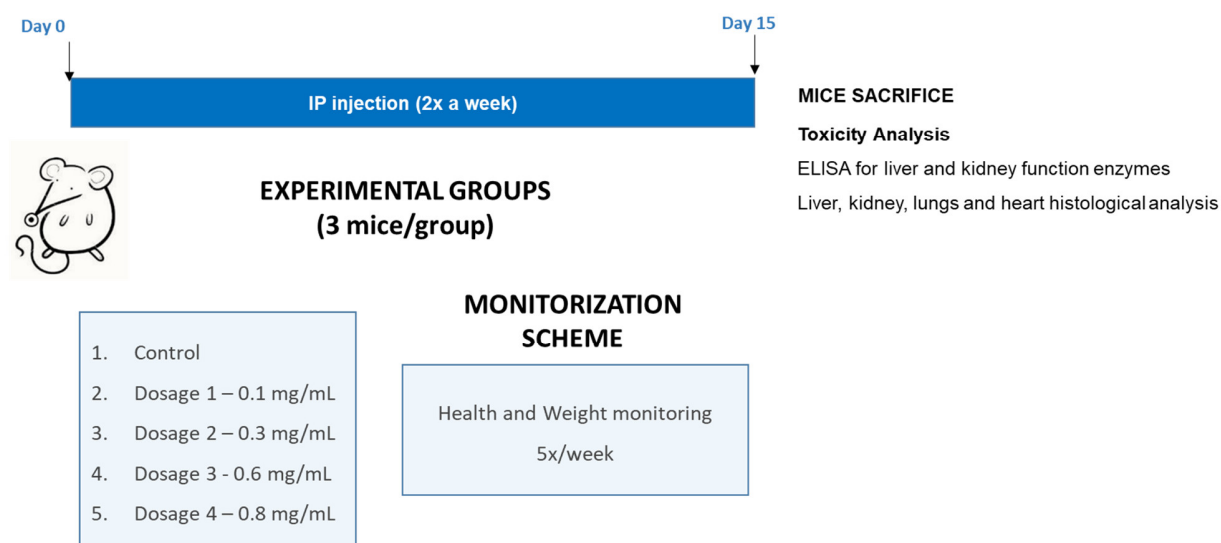

**Figure S28.** Experimental design of toxicology assay performed.

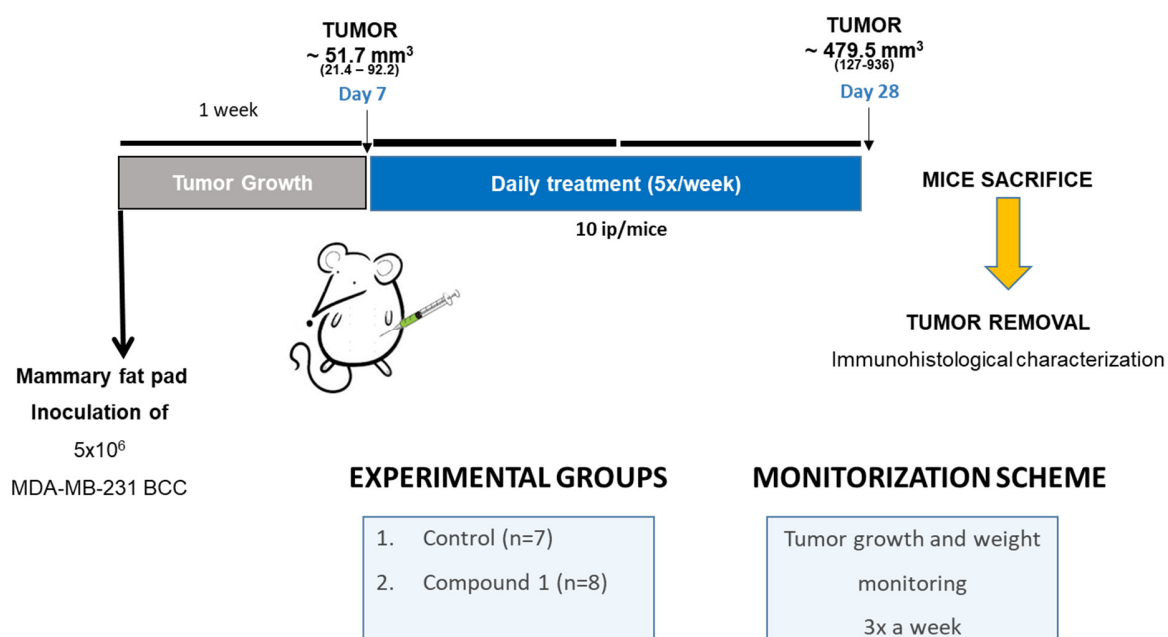

**Figure S29.** Experimental design of tumor growth assay.
